# Supplementary material for: An iron “nano-fishnet” for the rapid removal and surface clean-up of micro/nanoplastics from seawater
Source: Royal Society of Chemistry journal article supplement (doi:10.1039/d3en00344b), 2023-01-01
Supplement: d3en00344b1.pdf [file d3en00344b1.pdf]

## **Supporting Information**

### **Iron “Nano-Fishnet” for Rapid Removal and Surface Clean-up of Micro/nanoplastics from Seawater**

Yufei Zhang<sup>a</sup>, Zhiqiang Dong<sup>b, c</sup>, Zilong Deng<sup>b</sup>, Shuaiyi Shi<sup>a</sup>, Chenliu Tang<sup>a, \*</sup>, Xiang Hu<sup>a</sup>

<sup>a</sup>Research Group of Water Pollution Control and Water Reclamation, College of Chemical Engineering, Beijing University of Chemical Technology, Beijing 100029, P.R. China

<sup>b</sup>College of Environmental Science and Engineering, Tongji University, Shanghai, 200092, P.R. China

<sup>c</sup>China Railway Engineering Group Co., Beijing 100039, P.R. China

\*Corresponding author: **Chenliu Tang** (email: [tangchenliu@buct.edu.cn](mailto:tangchenliu@buct.edu.cn); phone: +86-15800931374)

**Table S1 Comparison of different physical strategies for micro/nanoplastics (MNPs) removal.**

| Removal Mechanism                             | Removal Technology                                                                             | Aquatic environment       | Type and size of plastics         | MNPs removal efficiency              | MNPs removal capacity                                          | Reaction time                             | Ref.                                          |     |
|-----------------------------------------------|------------------------------------------------------------------------------------------------|---------------------------|-----------------------------------|--------------------------------------|----------------------------------------------------------------|-------------------------------------------|-----------------------------------------------|-----|
| Adsorption                                    | Alkylated nanoscale zero-valent iron growing on the cellulose nanofibers (ac-nZVI) (This work) | Artificial Seawater (ASW) | 10 μm PS, PVC, PMMA               | 95.71% (PS)                          | 324.88 mg <sub>MNPs</sub> g <sub>Fe</sub> <sup>-1</sup> (PS)   | 1 min                                     | /                                             |     |
|                                               |                                                                                                |                           |                                   | 97.64% (PVC)                         | 278.99 mg <sub>MNPs</sub> g <sub>Fe</sub> <sup>-1</sup> (PVC)  |                                           |                                               |     |
|                                               |                                                                                                |                           |                                   | 94.97% (PMMA)                        | 267.71 mg <sub>MNPs</sub> g <sub>Fe</sub> <sup>-1</sup> (PMMA) |                                           |                                               |     |
|                                               |                                                                                                |                           |                                   | 97.47% (PS)                          | 141.50 mg <sub>MNPs</sub> g <sub>Fe</sub> <sup>-1</sup> (PS)   |                                           |                                               |     |
|                                               |                                                                                                |                           |                                   | 98.58% (PVC)                         | 179.01 mg <sub>MNPs</sub> g <sub>Fe</sub> <sup>-1</sup> (PVC)  |                                           |                                               |     |
|                                               | Hydrophobic Fe nanoparticles                                                                   | Seawater                  | >1 mm MPs (PE, PS, PU, PET, etc.) | 100 nm PS                            | 98.28%                                                         | 40.96 mg <sub>MNPs</sub> /g <sub>Fe</sub> | Mix for 5 min and magnetic recover for 30 min | [1] |
|                                               |                                                                                                |                           |                                   | 10-20 μm                             | 92%                                                            |                                           |                                               |     |
|                                               |                                                                                                |                           |                                   | 200 μm– 1 mm (PE, PS, PU, PVC, etc.) | 92%                                                            | /                                         |                                               |     |
|                                               |                                                                                                |                           |                                   | 200 μm– 1 mm (PE, PS, PU, PVC, etc.) | 84%                                                            |                                           |                                               |     |
|                                               |                                                                                                |                           |                                   | 200 μm– 1 mm (PE, PS, PU, PVC, etc.) | 84%                                                            |                                           |                                               |     |
| Oat protein sponges                           | DI water (pH=6-9, 25 °C)                                                                       | 1 μm PS                   | ≤81.2%                            | 5.7 mg L <sup>-1</sup>               | 24 h                                                           | [2]                                       |                                               |     |
| Chitin-based sponge (ChCN, ChGO, and ChGO-CT) | DI water (pH=6-8, 45 °C)                                                                       | 1 μm PS                   | 89.6-92.1%                        | 9.67 mg L <sup>-1</sup> (ChGO)       | 48 h                                                           | [3]                                       |                                               |     |
|                                               |                                                                                                |                           | 1 μm PS-COOH                      | 80.4-81.3%                           |                                                                |                                           | 8.86 mg L <sup>-1</sup> (ChGO)                |     |
|                                               |                                                                                                |                           | 1 μm PS-NH <sub>2</sub>           | 83.2-87.1%                           |                                                                |                                           | 12.9 mg L <sup>-1</sup> (ChCN)                |     |
| Biochar and modified biochar                  | DI water (25 °C)                                                                               | 1 μm PS                   | 94.81%                            | 100.6 mg g <sup>-1</sup> (MBCs)      | 5 h                                                            | [4]                                       |                                               |     |
|                                               |                                                                                                |                           | 98.75%                            | 98.52 mg g <sup>-1</sup>             |                                                                |                                           |                                               |     |

|                    |                                                                                                                                                                                                                                        |                                                               |                                                                                                                   |              |                                                    |         |      |
|--------------------|----------------------------------------------------------------------------------------------------------------------------------------------------------------------------------------------------------------------------------------|---------------------------------------------------------------|-------------------------------------------------------------------------------------------------------------------|--------------|----------------------------------------------------|---------|------|
|                    |                                                                                                                                                                                                                                        |                                                               |                                                                                                                   | 99.46%       | (Mg-MBCs)<br>99.21 mg g <sup>-1</sup><br>(Zn-MBCs) |         |      |
|                    | Photocatalytic TiO <sub>2</sub> -based Micromotor<br>(Au@mag@TiO <sub>2</sub> , mag=Ni, Fe)                                                                                                                                            | DI water                                                      | Extracts from<br>toothpaste, washing<br>powder, face cleansing<br>cream, and Baltic Sea<br>rubbing the surface of | 67-71%       | /                                                  | 24 h    | [5]  |
|                    | Ppolydopamine (PDA)@Fe <sub>3</sub> O <sub>4</sub> magnetic<br>microrobots (MagRobots)                                                                                                                                                 | DI water                                                      | a 50 mL plastic<br>centrifuge tube with a<br>nail file                                                            | /            | /                                                  | /       | [6]  |
|                    | BiVO <sub>4</sub> /Fe <sub>3</sub> O <sub>4</sub><br>microrobots                                                                                                                                                                       | DI water<br>(0.01-0.1 wt %<br>H <sub>2</sub> O <sub>2</sub> ) | PLA, PCL,<br>PET, PP<br>(100-200 μm)                                                                              | 10-70%       | /                                                  | /       | [7]  |
| <b>Coagulation</b> | FeCl <sub>3</sub>                                                                                                                                                                                                                      | DI water                                                      | PS, PE (< 500 μm)                                                                                                 | ~18.0-~62.0% | /                                                  | ~46 min | [8]  |
|                    | PAC                                                                                                                                                                                                                                    |                                                               | PS, PE (< 500 μm)                                                                                                 | 29.7-77.8%   |                                                    |         |      |
|                    | AlCl <sub>3</sub> , Al <sub>2</sub> (SO <sub>4</sub> ) <sub>3</sub> , FeCl <sub>3</sub> , CH <sub>3</sub> (CH <sub>2</sub> ) <sub>3</sub> SiCl <sub>3</sub> , and<br>CH <sub>3</sub> (CH <sub>2</sub> ) <sub>7</sub> SiCl <sub>3</sub> | Simulated<br>seawater                                         | PBMA (200-1500 μm)                                                                                                | >60%         | /                                                  | 24 h    | [9]  |
| <b>Filtration</b>  | Biochar sand filter                                                                                                                                                                                                                    | Distilled water<br>(pH=7.56)                                  | PS (10 μm)                                                                                                        | >95%         | /                                                  | ~4 h    | [10] |

**Table S2 Nature of real seawater.**

| Chemical indicators                 | Bo Hai | Yellow Sea | East China Sea | North China Sea |
|-------------------------------------|--------|------------|----------------|-----------------|
| pH                                  | 7.33   | 7.88       | 8.14           | 8.03            |
| Salinity (g/kg)                     | 27.89  | 30.46      | 31.84          | 33.84           |
| Total organic carbon (TOC, mg/L)    | 2.19   | 2.04       | 2.31           | 2.27            |
| Na <sup>+</sup> (g/L)               | 9.80   | 10.78      | 11.39          | 11.96           |
| K <sup>+</sup> (mg/L)               | 357.20 | 352.40     | 390.60         | 404.60          |
| Ca <sup>2+</sup> (mg/L)             | 389.70 | 372.30     | 401.90         | 417.20          |
| Mg <sup>2+</sup> (g/L)              | 1.19   | 1.34       | 1.40           | 1.48            |
| Cl <sup>-</sup> (g/L)               | 18.21  | 21.89      | 23.45          | 25.14           |
| SO <sub>4</sub> <sup>2-</sup> (g/L) | 1.34   | 1.27       | 1.26           | 1.24            |

**Table S3 Fe concentration in supernatant after ac-nZVI reaction with different MNPs in ASW.**

| Types of MNPs | Fe <sup>2+</sup> /Fe <sup>3+</sup> concentration (ppm) |           |           |
|---------------|--------------------------------------------------------|-----------|-----------|
|               | 100 nm                                                 | 2 μm      | 10 μm     |
| PS            | 0.49±0.03                                              | 0.45±0.02 | 0.53±0.06 |
| PVC           | -                                                      | 0.51±0.05 | 0.47±0.02 |
| PMMA          | -                                                      | 0.71±0.14 | 0.56±0.01 |

**Table S4 XPS Fe 2p concentration (atomic%) of nZVI and ac-nZVI.**

| Materials | Fe <sup>0</sup> | Fe <sup>2+</sup> | Fe <sup>3+</sup> |
|-----------|-----------------|------------------|------------------|
| nZVI      | 12.65           | 51.18            | 36.16            |
| ac-nZVI   | 36.30           | 22.49            | 41.23            |

**Table S5 Calculated collection capability of ac-nZVI for different MNPs in ASW.**

| Types of MNPs | Calculated collection capability (10 <sup>8</sup> pcs/g <sub>Fe</sub> ) |              |           |
|---------------|-------------------------------------------------------------------------|--------------|-----------|
|               | 100 nm                                                                  | 2 μm         | 10 μm     |
| PS            | 84559.00±6600.33                                                        | 450.08±6.08  | 6.46±1.94 |
| PVC           | -                                                                       | 358.01±18.03 | 5.30±0.10 |
| PMMA          | -                                                                       | 335.25±14.96 | 5.09±0.68 |

**Table S6 The remaining Pb<sup>2+</sup> concentration in MNPs-Pb(II) solution after reacting with ac-nZVI at 1 h, 2 h, 6 h and 12 h.**

| Reaction time                        | 1 h | 2 h | 6 h | 12 h |
|--------------------------------------|-----|-----|-----|------|
| Pb <sup>2+</sup> concentration (ppb) | BDL | BDL | BDL | BDL  |

BDL means below detection limit.

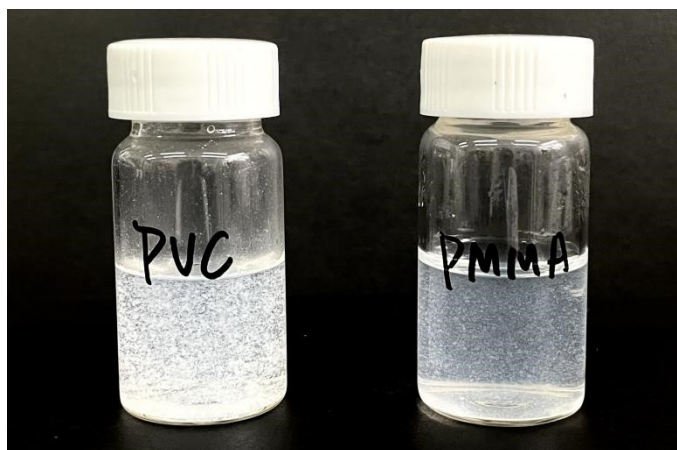

**Fig. S1 100 nm PVC MNPs and 100 nm PMMA MNPs dispersed in ASW.**

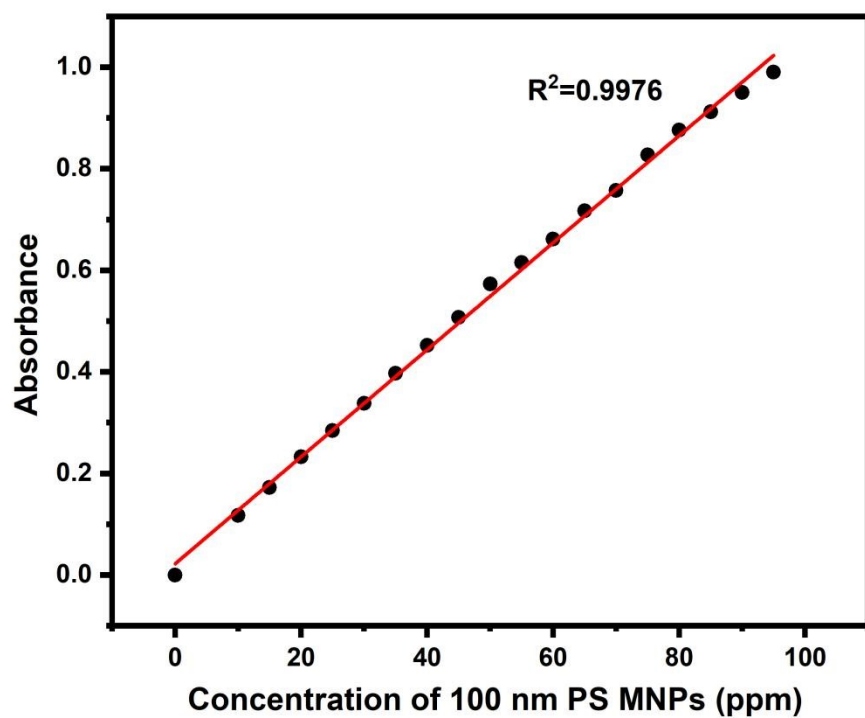

**Fig. S2** Calibration curve of absorbance for 100 nm PS MNPs.

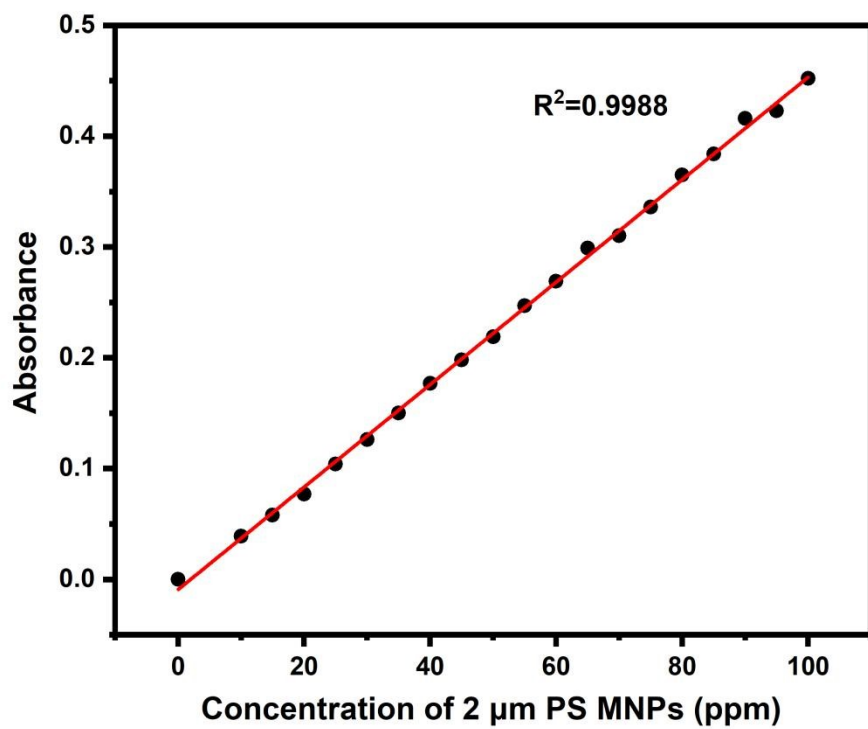

**Fig. S3 Calibration curve of absorbance for 2 μm PS MNPs.**



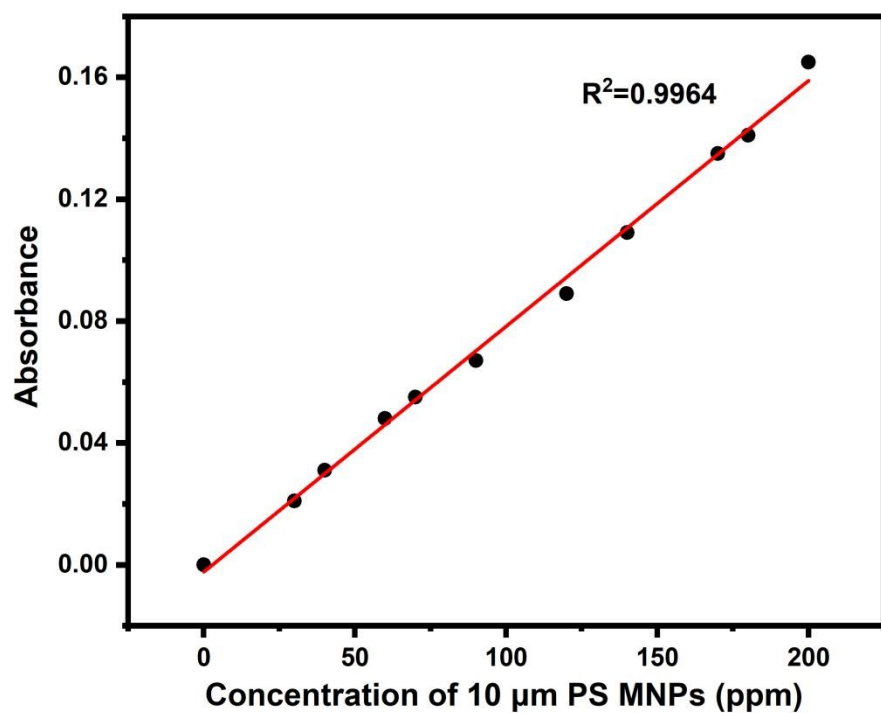

Fig. S4 Calibration curve of absorbance for 10 μm PS MNPs.

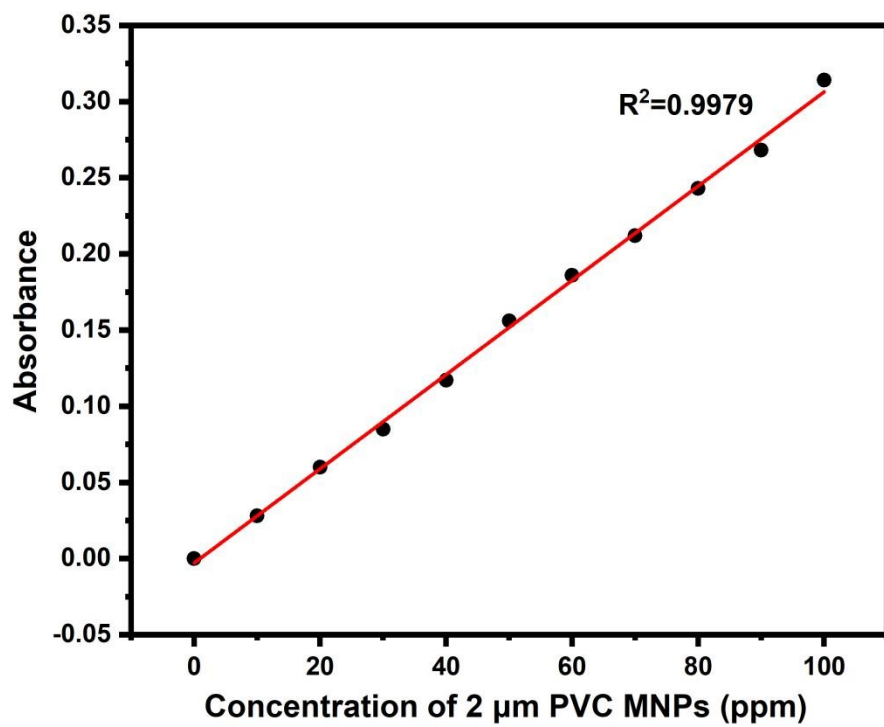

**Fig. S5** Calibration curve of absorbance for 2 μm PVC MNPs.

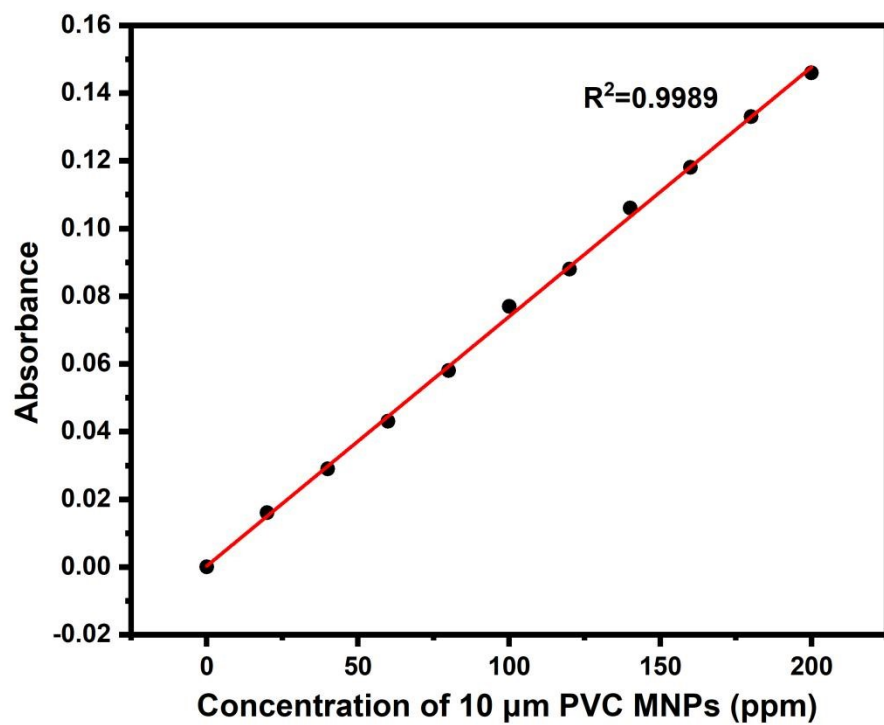

**Fig. S6** Calibration curve of absorbance for 10 μm PVC MNPs.

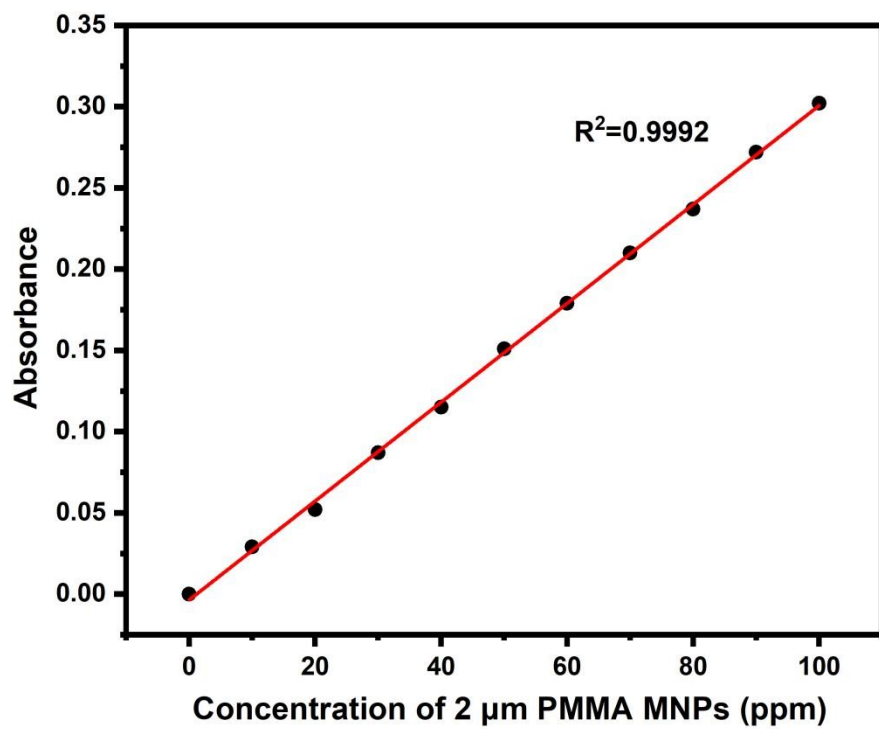

**Fig. S7** Calibration curve of absorbance for 2 μm PMMA MNPs.

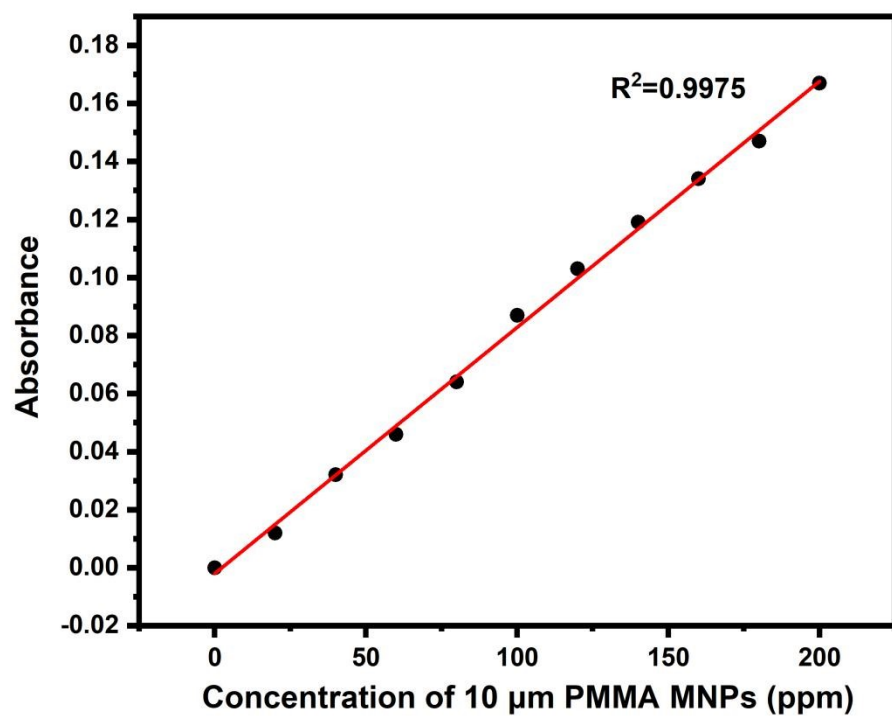

**Fig. S8 Calibration curve of absorbance for 10 μm PMMA MNPs.**

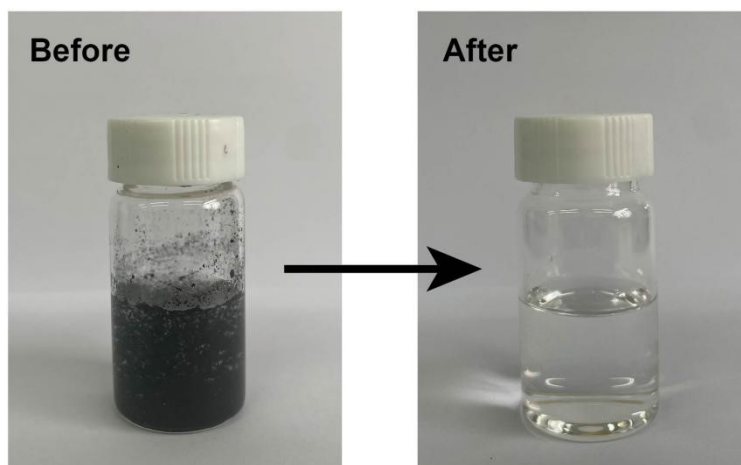

**Fig. S9 Images of magnetic separation of ac-nZVI from ASW.** After magnetic recovery, the absorbance of the supernatant was clear and close to that of ASW, that was, the change in absorbance mainly originated from the variations of MNPs concentration.

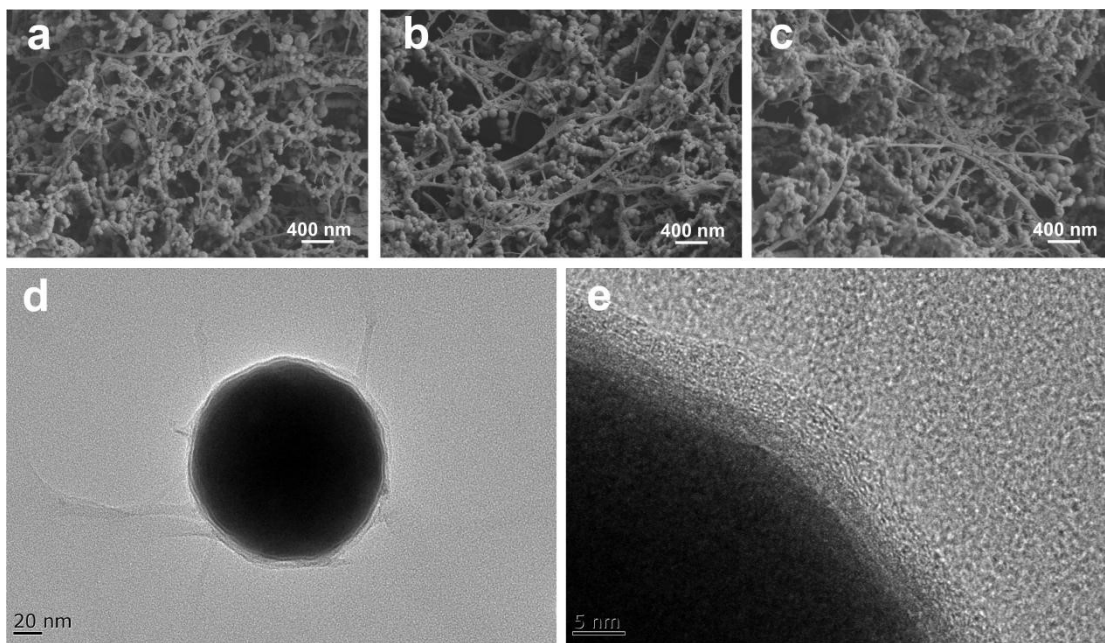

**Fig. S10 (a)-(c) SEM images and (d)-(e) TEM images of ac-nZVI.**

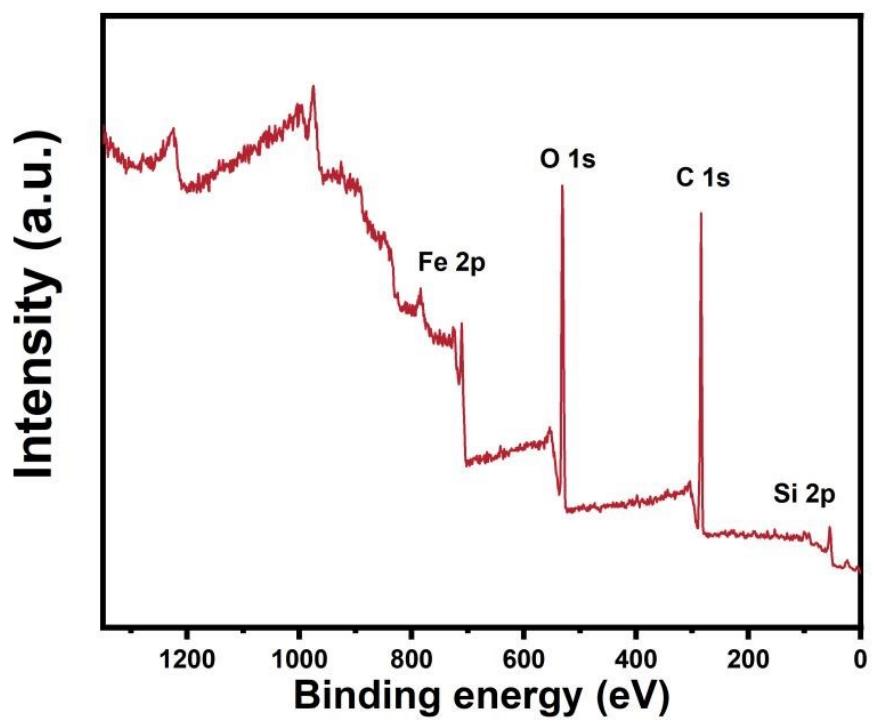

Fig. S11 XPS survey of ac-nZVI.



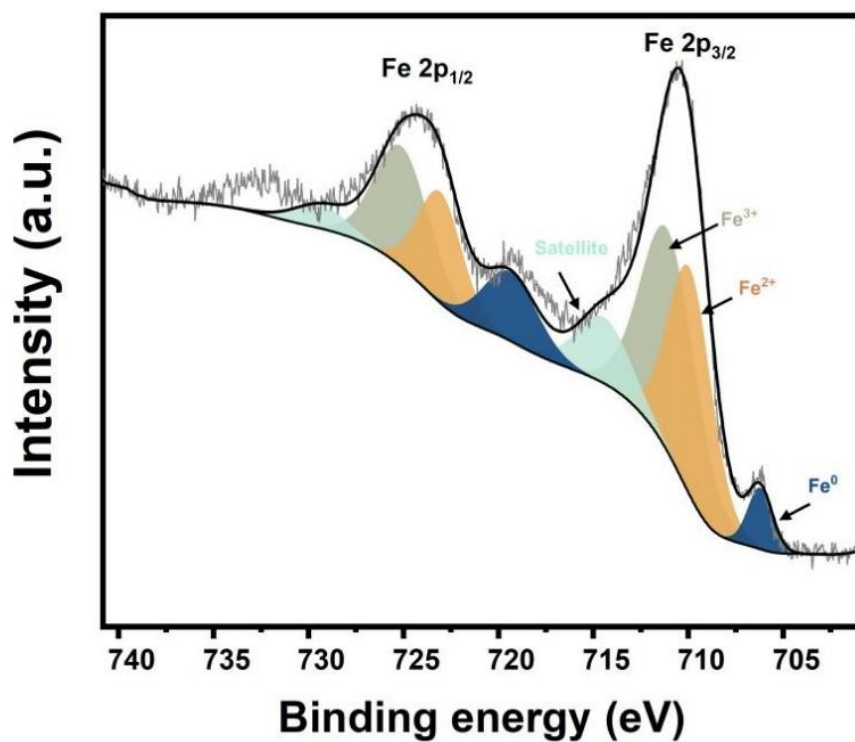

Fig. S12 XPS Fe 2p fine spectrum of nZVI.

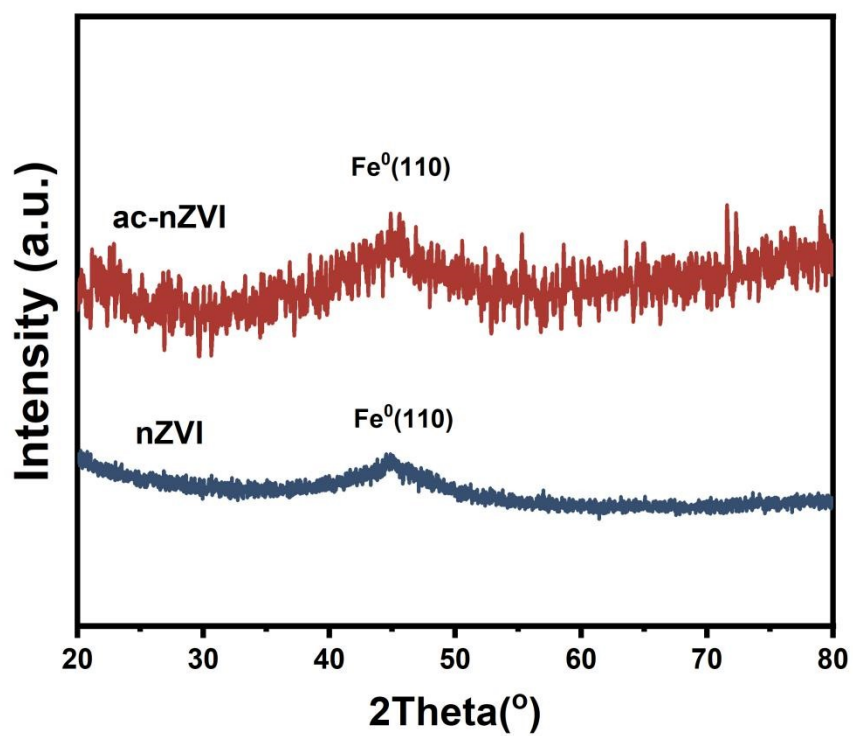

Fig. S13 XRD patterns of nZVI and ac-nZVI.

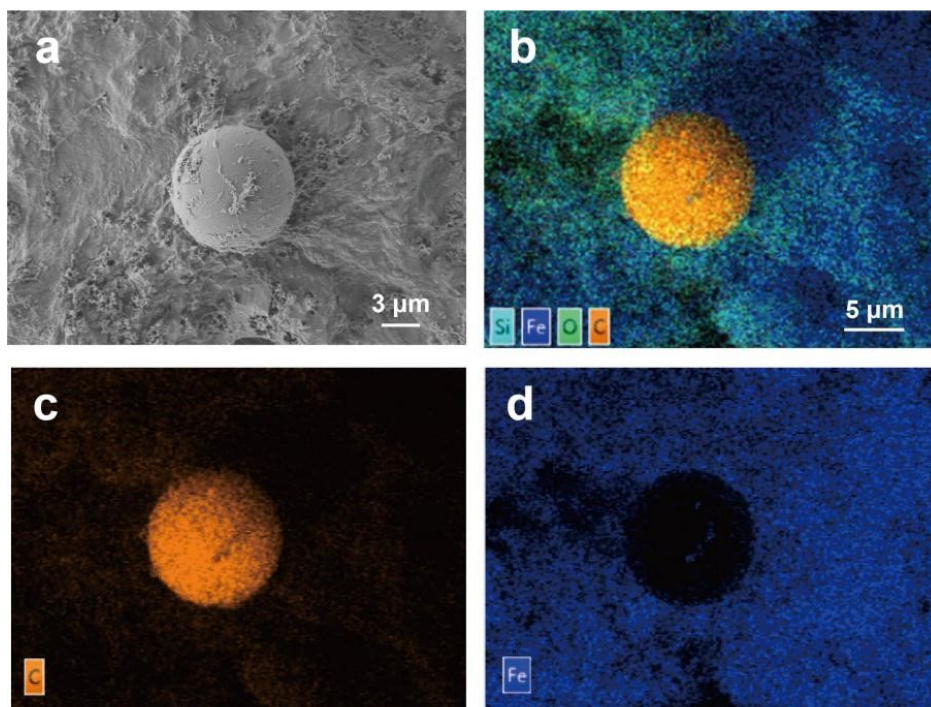

**Fig. S14 (a) SEM image; (b)-(d) EDS mapping of 10 μm PS MNPs removed by ac-nZVI. Conditions: MNPs concentration = 100 mg/L (ASW, initial pH = 8), ac-nZVI dosage = 1 g/L, reaction time = 1 min, T = 25°C.**

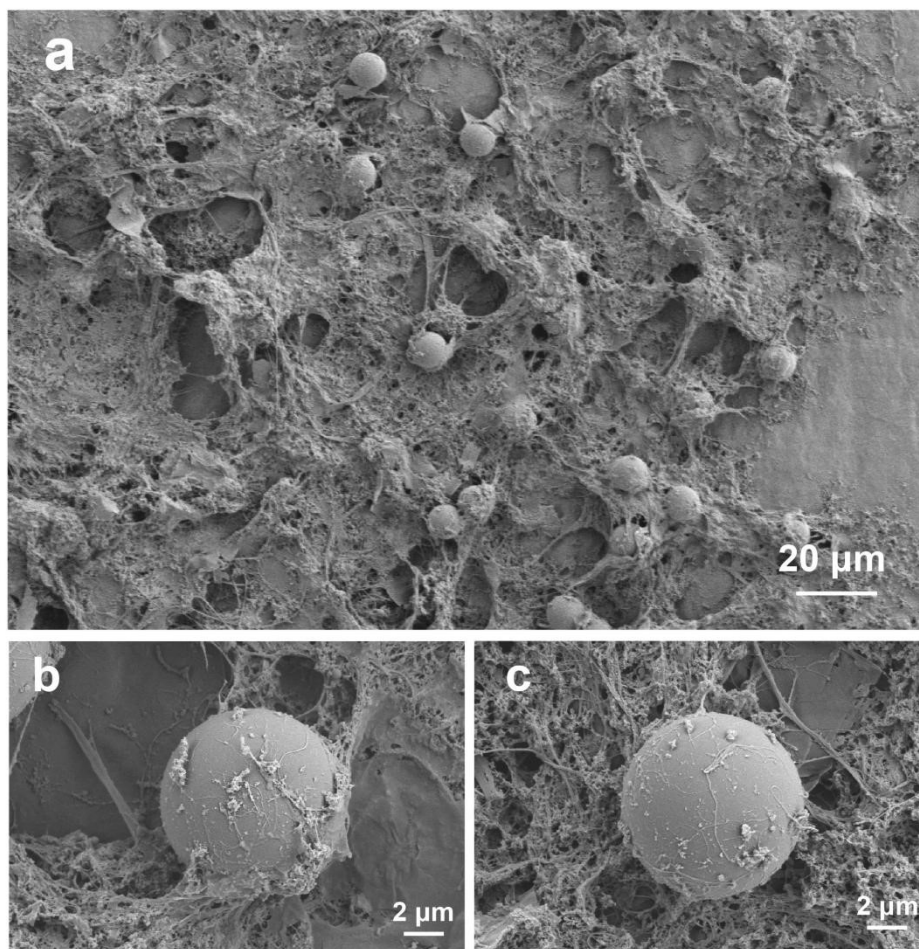

**Fig. S15 (a)-(c) SEM images of 10 μm PVC MNPs removed by ac-nZVI. Conditions: MNPs concentration = 100 mg/L (ASW, initial pH = 8), ac-nZVI dosage = 1 g/L, reaction time = 1 min, T = 25°C.**

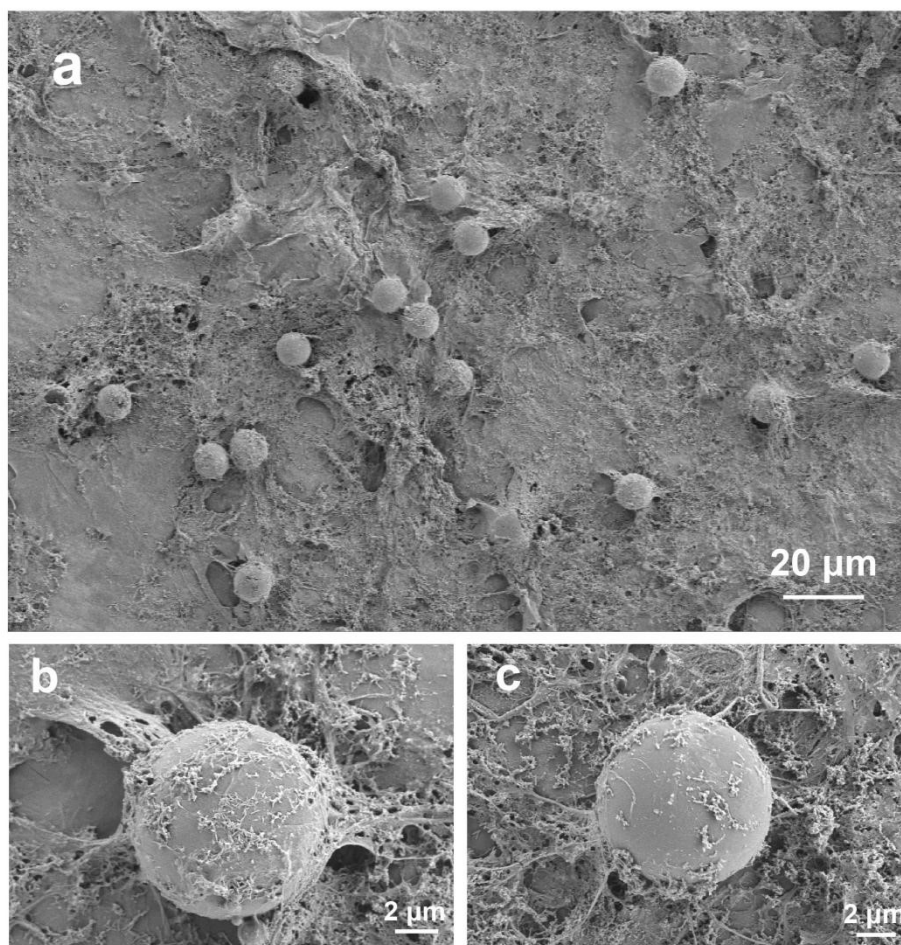

**Fig. S16 (a)-(c) SEM images of 10  $\mu\text{m}$  PMMA MNPs removed by ac-nZVI. Conditions: MNPs concentration = 100 mg/L (ASW, initial pH = 8), ac-nZVI dosage = 1 g/L, reaction time = 1 min, T = 25°C.**

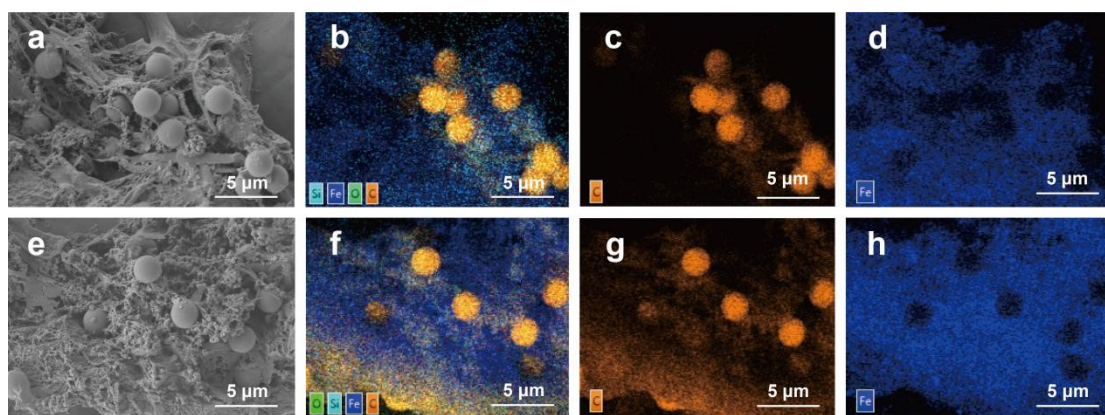

**Fig. S17 (a) and (e) SEM images; (b)-(d) and (f)-(h) EDS mapping of 2  $\mu\text{m}$  PS MNPs removed by ac-nZVI. Conditions: MNPs concentration = 100 mg/L (ASW, initial pH = 8), ac-nZVI dosage = 1 g/L, reaction time = 1 min, T = 25°C.**

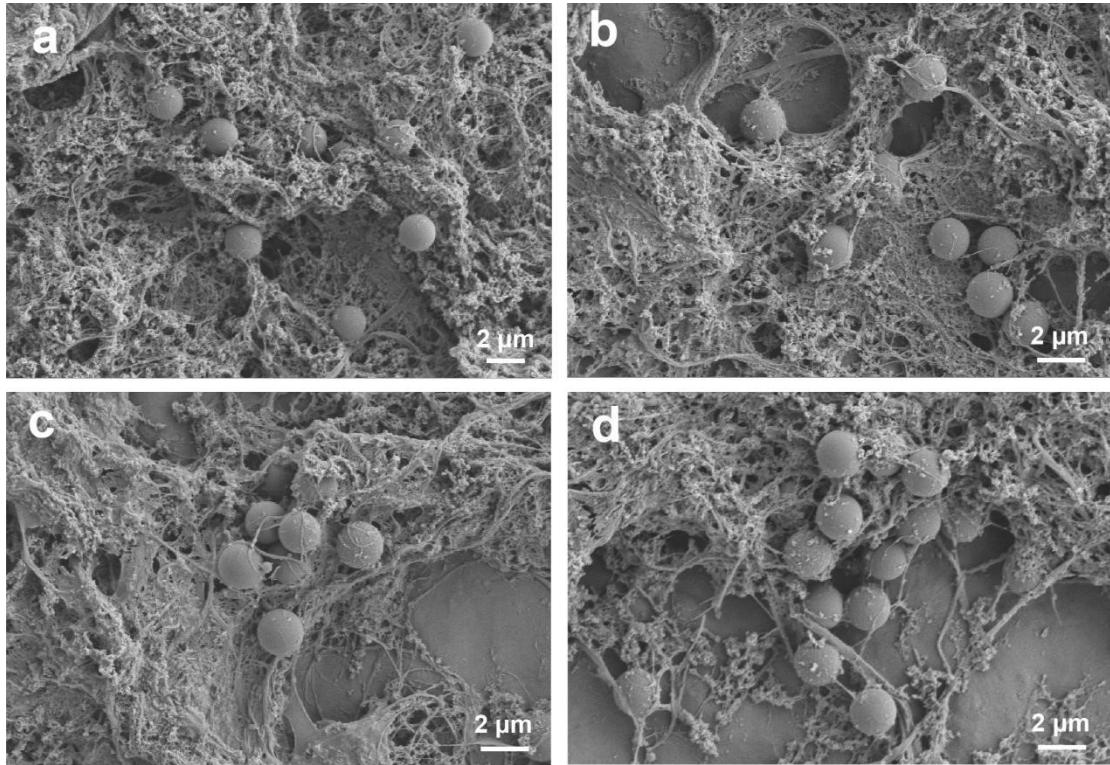

**Fig. S18 (a)-(d) SEM images of 2  $\mu\text{m}$  PVC MNPs removed by ac-nZVI. Conditions: MNPs concentration = 100 mg/L (ASW, initial pH = 8), ac-nZVI dosage = 1 g/L, reaction time = 1 min, T = 25°C.**



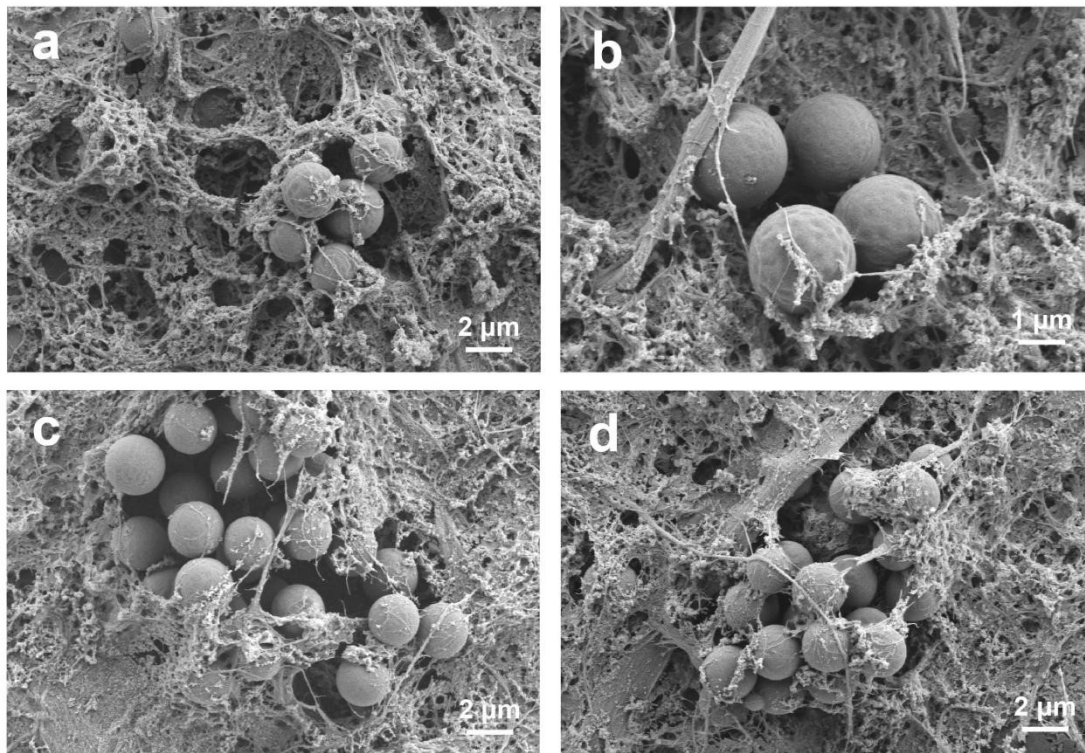

**Fig. S19 (a)-(d) SEM images of 2  $\mu\text{m}$  PMMA MNPs removed by ac-nZVI. Conditions: MNPs concentration = 100 mg/L (ASW, initial pH = 8), ac-nZVI dosage = 1 g/L, reaction time = 1 min, T = 25°C.**



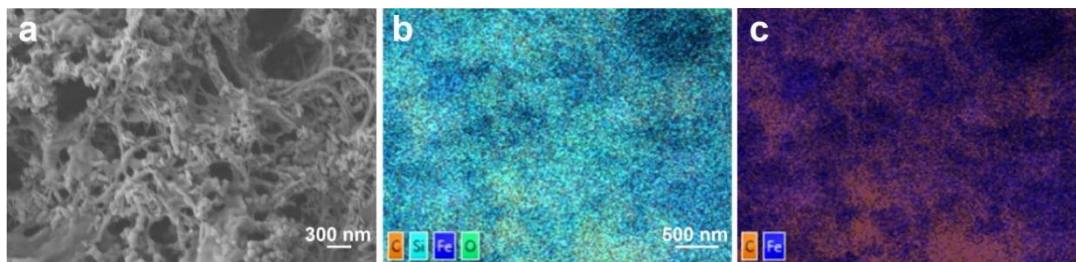

**Fig. S20 (a) SEM image; (b) and (c) EDS mapping of 100 nm PS MNPs removed by ac-nZVI. Conditions: MNPs concentration = 100 mg/L (ASW, initial pH = 8), ac-nZVI dosage =1 g/L, reaction time = 1 min, T = 25°C.**

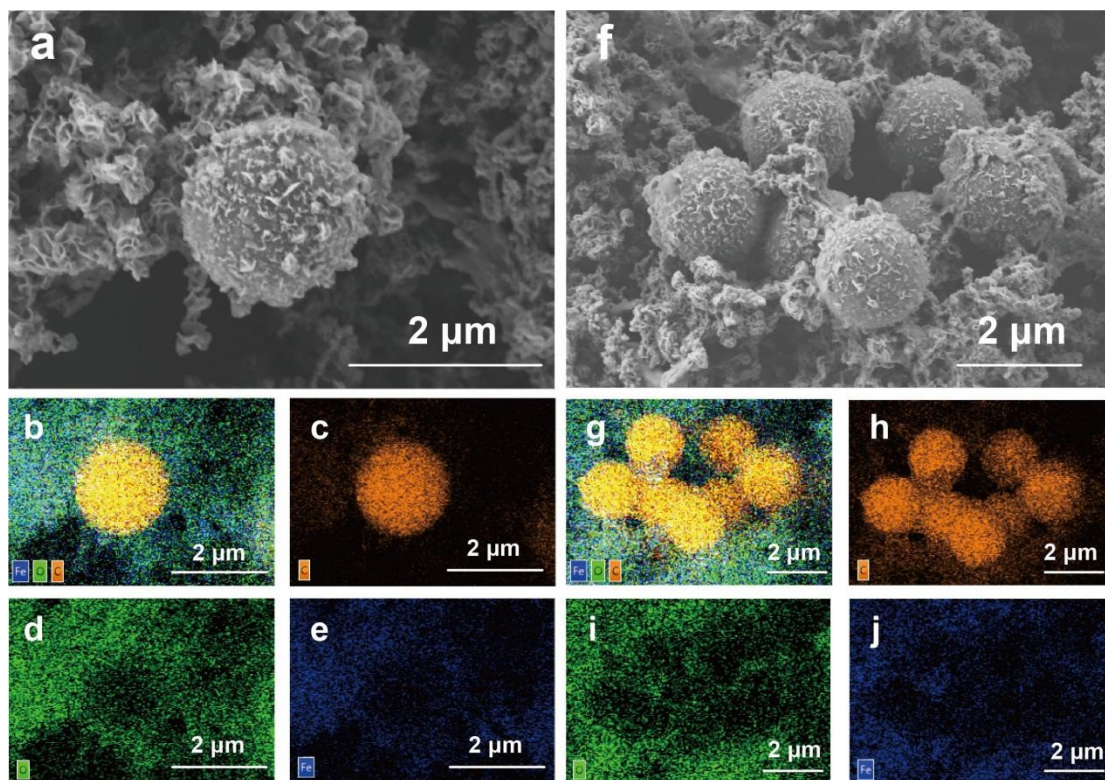

**Fig. S21 (a) and (f) SEM images; (b)-(e) and (g)-(j) EDS mapping of 2  $\mu\text{m}$  MNPs removed by nZVI. Conditions: MNPs concentration = 100 mg/L (ASW, initial pH = 8), nZVI dosage = 1 g/L, reaction time = 1 min, T = 25°C.**

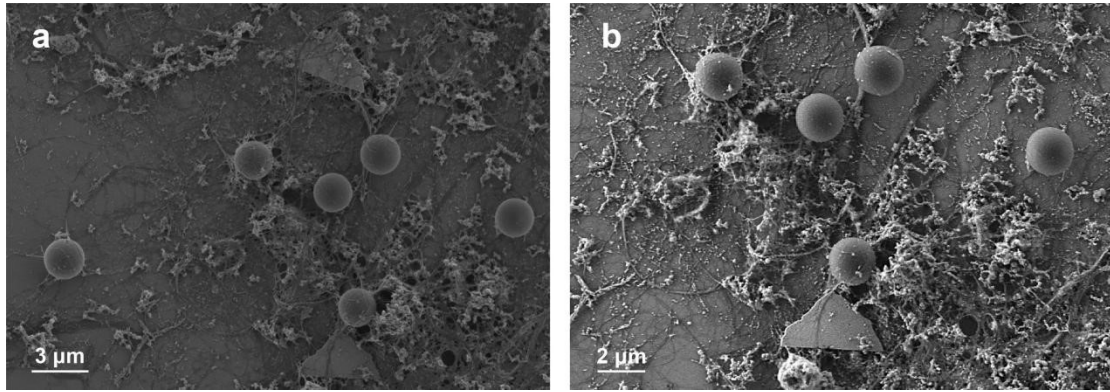

**Fig. S22 (a) and (b) SEM images of 2 μm MNPs-Pb(II) reacting with ac-nZVI. Conditions: MNPs initial concentration = 10 mg/L (ASW, initial pH = 8), ac-nZVI dosage = 0.5 g/L, T = 25°C.**

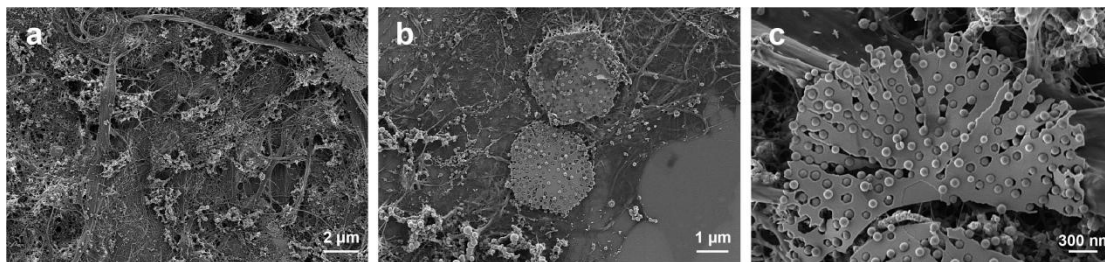

**Fig. S23 (a)-(c) SEM images of 100 nm MNPs-Pb(II) reacting with ac-nZVI. Conditions: MNPs initial concentration = 10 mg/L (ASW, initial pH = 8), ac-nZVI dosage = 0.5 g/L, T = 25°C. Similar polygon flakes are formed on the netting wires of ac-nZVI. 100 nm MNPs participate in the formation of lead products, breaking and embedding into the nanoplate structure.**

**Video S1-S3 The procedure of 10 μm, 2 μm, 100 nm PS MNPs removal with ac-nZVI, respectively.**

## References

- 1 J. Grbic, B. Nguyen, E. Guo, J. B. You, D. Sinton and C. M. Rochman, Magnetic Extraction of Microplastics from Environmental Samples, *Environ. Sci. Technol. Lett.*, 2019, **6**, 68–72.
- 2 Z. Wang, C. Sun, F. Li and L. Chen, Fatigue Resistance, Re-Usable and Biodegradable Sponge Materials from Plant Protein with Rapid Water Adsorption Capacity for Microplastics Removal, *Chem. Eng. J.*, 2021, **415**, 129006.
- 3 C. Sun, Z. Wang, H. Zheng, L. Chen and F. Li, Biodegradable and Re-Usable Sponge Materials Made from Chitin for Efficient Removal of Microplastics, *J. Hazard. Mater.*, 2021, **420**, 126599.
- 4 J. Wang, C. Sun, Q.-X. Huang, Y. Chi and J.-H. Yan, Adsorption and Thermal Degradation of Microplastics from Aqueous Solutions by Mg/Zn Modified Magnetic Biochars, *J. Hazard. Mater.*, 2021, **419**, 126486.
- 5 L. Wang, A. Kaeppler, D. Fischer and J. Simmchen, Photocatalytic TiO<sub>2</sub> Micromotors for Removal of Microplastics and Suspended Matter, *ACS Appl. Mater. Interfaces*, 2019, **11**, 32937–32944.
- 6 H. Zhou, C. C. Mayorga-Martinez and M. Pumera, Microplastic Removal and Degradation by Mussel-Inspired Adhesive Magnetic/Enzymatic Microrobots, *Small Methods*, 2021, **5**, 2100230.
- 7 S. M. Beladi-Mousavi, S. Hermanová, Y. Ying, J. Plutnar and M. Pumera, A Maze in Plastic Wastes: Autonomous Motile Photocatalytic Microrobots against Microplastics, *ACS Appl. Mater. Interfaces*, 2021, **13**, 25102–25110.
- 8 G. Zhou, Q. Wang, J. Li, Q. Li, H. Xu, Q. Ye, Y. Wang, S. Shu and J. Zhang, Removal of Polystyrene and Polyethylene Microplastics Using PAC and FeCl<sub>3</sub> Coagulation: Performance and Mechanism, *Sci. Total Environ.*, 2021, **752**, 141837.
- 9 P. S. Lee and S. M. Jung, Quantitative Analysis of Microplastics Coagulation-Removal Process for Clean Sea Salt Production, *Int. J. Environ. Sci. Technol.*,

2022, **19**, 5205–5216.

- 10 Z. Wang, M. Sedighi and A. Lea-Langton, Filtration of Microplastic Spheres by Biochar: Removal Efficiency and Immobilisation Mechanisms, *Water Res.*, 2020, **184**, 116165.
